# Supplementary material
Source: PubMed Central journal article supplement (PMC2781645)
Supplement: supp_M109.024471_jbc.M109.024471-1.pdf [file supp_M109.024471_jbc.M109.024471-1.pdf]

**SUPPLEMENTAL DATA**

**Supplemental Table I**

**WT and MUT (INE) biotinylated oligonucleotides**

| Name      | Sequences                                                       |
|-----------|-----------------------------------------------------------------|
| WT-INE    | TGATGCAAC                                                       |
| MUT-INE   | TG <u>t</u> aa <u>C</u> cAC                                     |
| 3xWT-INE  | (GCGTGGTGCATGATGCAACAGCGGGAGGGA) <sub>3</sub>                   |
| 3xMUT-INE | (GCGTGGTGCATG <u>t</u> aa <u>C</u> cACAGCGGGAGGGA) <sub>3</sub> |

The oligonucleotide names and their corresponding sequences are listed in the table. Underlined lower-case letters denote mutated nucleotides.

**Supplemental Table II**

**Identification of proteins associated with the WT and MUT (INE) by mass spectrometry**

| <u>Probe</u> | <u>Protein name</u>                          | <u>Calculated M.W.</u><br>(kDa) | <u>Peptide #</u><br>(% Seq. coverage) |
|--------------|----------------------------------------------|---------------------------------|---------------------------------------|
| 3xWT-INE     | Purine rich binding protein A                | 33                              | 10 (27%)                              |
|              | Purine rich binding protein B                | 33                              | 12 (46%)                              |
|              | Poly (ADP-ribose) polymerase family member 1 | 113                             | 8 (12%)                               |
| 3xMUT-INE    | Purine rich binding protein B                | 33                              | 7 (23%)                               |
|              | Poly (rC) binding protein 1                  | 38                              | 6 (19%)                               |
|              | Poly (ADP-ribose) polymerase family member 1 | 113                             | 9 (13%)                               |

The interacting proteins to the biotinylated oligonucleotide probe are listed in the table. Their molecular weights, the number of peptide recovered, and the percentage of the sequence covered are included.

### Supplemental Table III

#### Sequences of RT-PCR and ChIP Primers and siRNA

| <b>mRNA</b>         | <b>Sequence</b> |                                  |
|---------------------|-----------------|----------------------------------|
| 18S                 | Forward         | 5'-CAACAACCTGGGCTAAGGGTCACTAC-3' |
|                     | Reverse         | 5'-CACCACATCCAAGACAGAGTCAACC-3'  |
| ASNS                | Forward         | 5'-TTGACCCGCTGTTTGGGAATG-3'      |
|                     | Reverse         | 5'-CGCCTTGTGGTTGTAGATTTTCAC-3'   |
| $\beta$ -GAL        | Forward         | 5'-ATCTCTATCGTGCGGTGGTTGAACTG-3' |
|                     | Reverse         | 5'-ATGACCTGACCATGCAGAGGATGATG-3' |
| Cat-1               | Forward         | 5'-CTTTGGATTCTCTGGTGTCCCTGTC-3'  |
|                     | Reverse         | 5'-GTTCTTGACTTCTTCCCCTGTGG-3'    |
| GAPDH               | Forward         | 5'-ACTTTGGCATCGTGGAAGGG-3'       |
|                     | Reverse         | 5'-TCATCATACTTGGCAGGTTTCTCC-3'   |
| Cat-1 5'-UTR/LUC    | Forward         | 5'-ATCCCCTCAGCTAGCAGGTGTGA-3'    |
|                     | Reverse         | 5'-TTTCTTTATGTTTTTGGCGTCTTC-3'   |
| rRPL27              | Forward         | 5'-GCAAGAAGAAGATCGCCAAG-3'       |
|                     | Reverse         | 5'-CGCTCCTCAAACCTTGACCTT-3'      |
| <b>ChIP Primers</b> | <b>Sequence</b> |                                  |
| Cat-1 exon1 AARE    | Forward         | 5'-CGCTGTCATTGGTGCCTGGGAAG-3'    |
|                     | Reverse         | 5'-GGAATCCGAGCCGGTTTCATCAG-3'    |
| Cat-1 INE           | Forward         | 5'-CGCCTCCTCCGAGTCCATCTTG-3'     |
|                     | Reverse         | 5'-CCAGGTCGCCCCGTGCTCAC-3'       |
| <b>siRNA</b>        | <b>Sequence</b> |                                  |
| Pura $\alpha$       |                 | 5'-GUUUCUACCUGGACGUGAA-3'        |
|                     |                 | 5'-GCGACUACCUGGGCGACUU-3'        |
|                     |                 | 5'-ACAAGUACGGCGUGUUUAU-3'        |
|                     |                 | 5'-GGAAGAAGAUUGAUCAAAC-3'        |

The sequences of primers and siRNA used in this study are listed in the table.
